# Supplementary material for: Butyrate Inhibits Colorectal Cancer Cell Proliferation through Autophagy Degradation of β-Catenin Regardless of APC and β-Catenin Mutational Status
Source: MDPI journal article supplement (doi:10.3390/biomedicines10051131), 2022-05-13
Supplement: s1 [file s1]

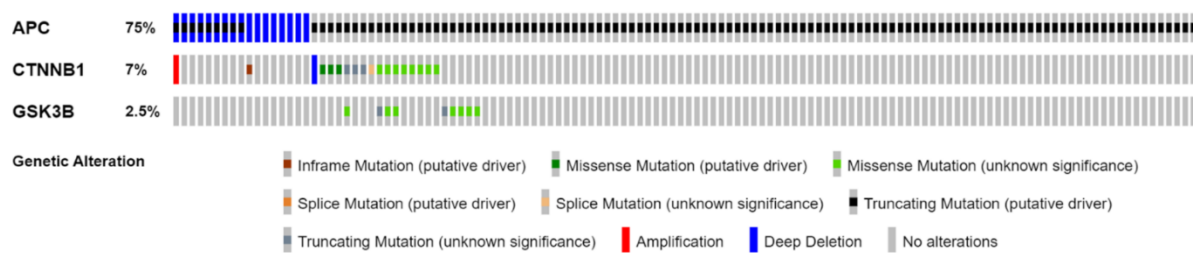

**Figure S1.** Oncoprint of somatic mutation. The oncoprint shows the genetic alterations and mRNA expression levels of *APC*, *CTNNB1*, and *GSK3β* in 526 colorectal adenocarcinoma (TCGA, PanCancer Atlas) patients.

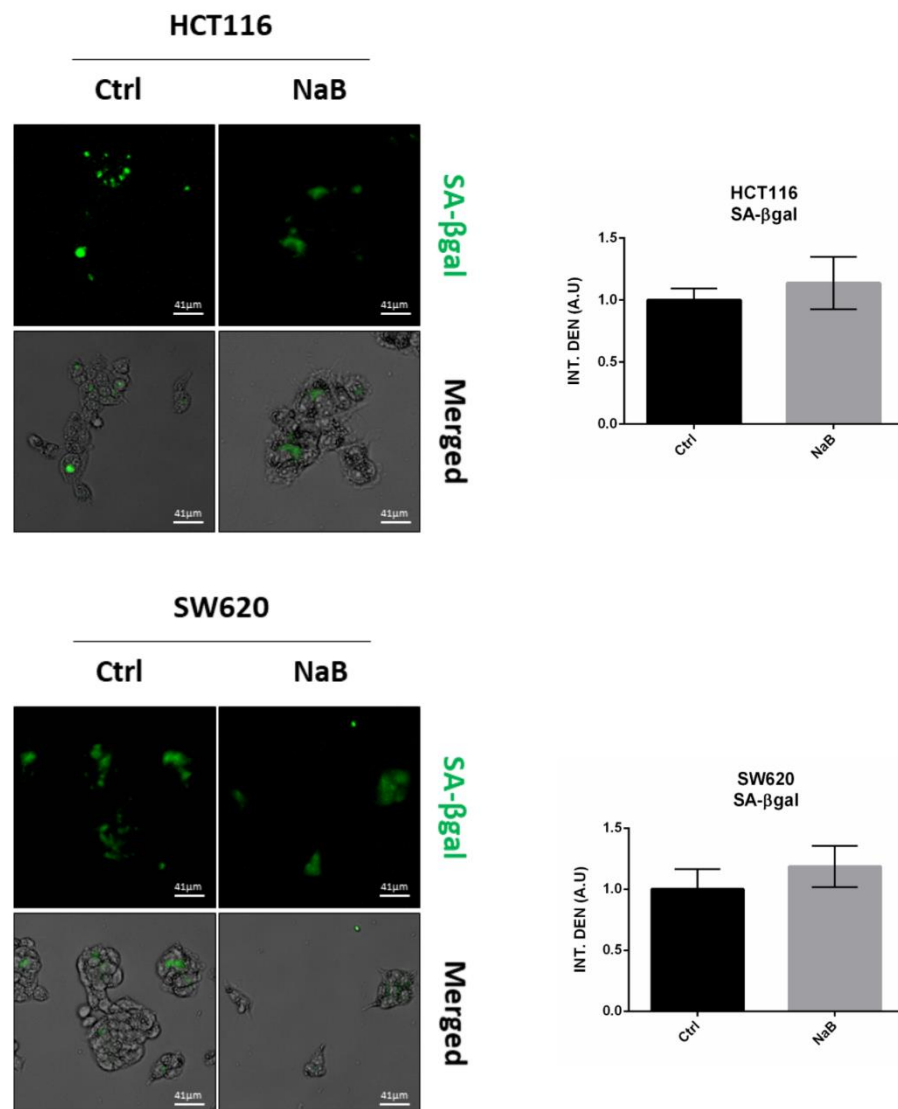

**Figure S2.** SA-βgal activity. HCT116 and SW620 cells were plated on 48-well plate and treated or not with 2mM NaB. Medium was replaced, and substances re-added every 24 h. Following 48 h, cells were incubated with β-galactosidase green fluorescent probe overnight. Representative images per each condition are shown. Fluorescence signal was quantified by using the ImageJ software and the graph represents the average fluorescence ± SD.
